# Supplementary material for: Effect of surface charge of PDDA-protected gold nanoparticles on the specificity and efficiency of DNA polymerase chain reaction
Source: Royal Society of Chemistry journal article supplement (doi:10.1039/c2an36145k), 2012-11-07
Supplement: c2an36145k.pdf [file c2an36145k.pdf]

## **Electronic Supplementary Information for**

### **Effect of surface charge of PDDA-protected gold nanoparticles on the specificity and efficiency of DNA polymerase chain reaction**

Longfei Yuan,<sup>a</sup> Yujian He,<sup>a,b\*</sup>

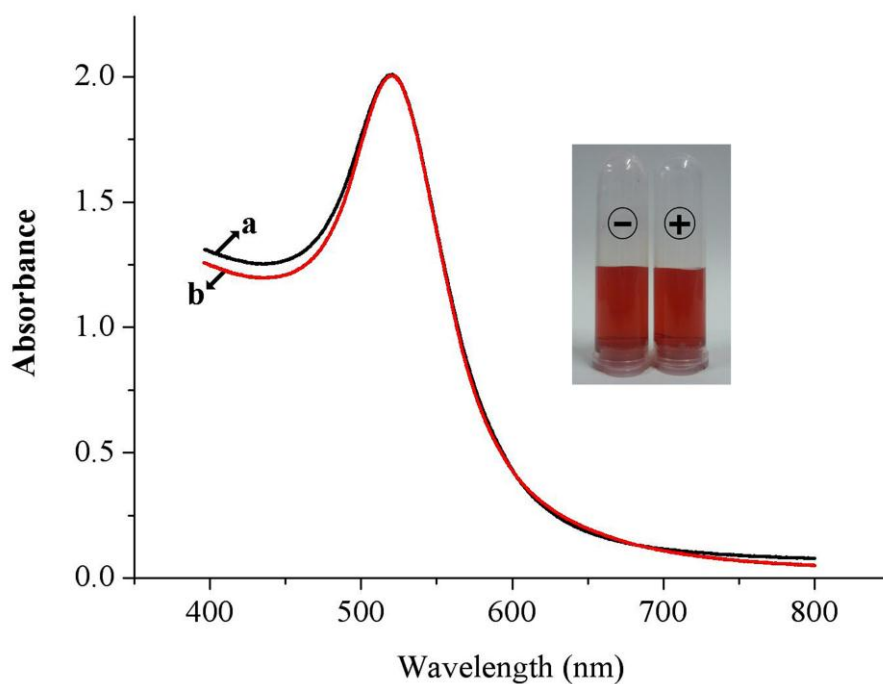

**Figure S1.** UV-vis spectra of 5.5 nM PDDA-AuNPs positively charged and  $\text{Na}_3\text{Ct-AuNPs}$  negatively charged. Inset: photographs of PDDA-AuNPs (right, corresponding to the line a in UV-vis spectra) and  $\text{Na}_3\text{Ct-AuNPs}$  (left, corresponding to the line b in UV-vis spectra).
